# Supplementary material
Source: PubMed Central journal article supplement (PMC7163712)
Supplement: EVJ-52-163-s001.pdf [file EVJ-52-163-s001.pdf]

**Supplementary Item 1:**

**International Equine Colitis Research Group**

Luis Arroyo, Department of Clinical Studies, University of Guelph, Guelph, Ontario N1G 2W1, Canada [larroyo@uoguelph.ca](mailto:larroyo@uoguelph.ca)

Carolyn E. Arnold, Large Animal Clinical Sciences, College of Veterinary Medicine and Biomedical Sciences, Texas A&M University, College Station, Texas 77843-4474, USA [carnold@cvm.tamu.edu](mailto:carnold@cvm.tamu.edu)

Melanie Barham, Animal Health Laboratory, University of Guelph, Guelph, Ontario N1G 2W1, Canada [barhamm@uoguelph.ca](mailto:barhamm@uoguelph.ca)

Marcio C. Costa, Département de Biomédecine Vétérinaire, Faculté de Médecine Vétérinaire, Université de Montréal, St Hyacinthe, Québec J2S 2M2, Canada [marcio-costa@umontreal.ca](mailto:marcio-costa@umontreal.ca)

Stephen E. Greiman, Department of Biology, Georgia Southern University, Statesboro, Georgia 30460, USA [sgreiman@georgiasouthern.edu](mailto:sgreiman@georgiasouthern.edu)

Gary Magdesian, Department of Medicine and Epidemiology, School of Veterinary Medicine, University of California, Davis, CA 95616, USA [kgmagdeisan@ucdavis.edu](mailto:kgmagdeisan@ucdavis.edu)

John F. Prescott, Department of Pathobiology, University of Guelph, Guelph, Ontario N1G 2W1, Canada [prescott@uoguelph.ca](mailto:prescott@uoguelph.ca)

Harold Schott, Department of Large Animal Clinical Sciences, College of Veterinary Medicine, Michigan State University, East Lansing, Michigan 48824, USA [schott@msu.edu](mailto:schott@msu.edu)

David Sutton, The Weipers Centre Equine Hospital, School of Veterinary Medicine, University of Glasgow, Glasgow G61 1QH, UK [david.sutton@glasgow.ac.uk](mailto:david.sutton@glasgow.ac.uk)

Francisco Uzal, California Animal Health and Food Safety Laboratory, San Bernardino, University of California, California 92408-2113, USA [fuzal@cafhs.ucdavis.edu](mailto:fuzal@cafhs.ucdavis.edu)

Ashley Whitehead, Department of Veterinary Clinical and Diagnostic Science, Faculty of Veterinary Medicine, University of Calgary, Calgary, Alberta T2N 4Z6, Canada [ae.whitehead@ucalgary.ca](mailto:ae.whitehead@ucalgary.ca)
